# Supplementary material
Source: PubMed Central journal article supplement (PMC4131552)

**A**

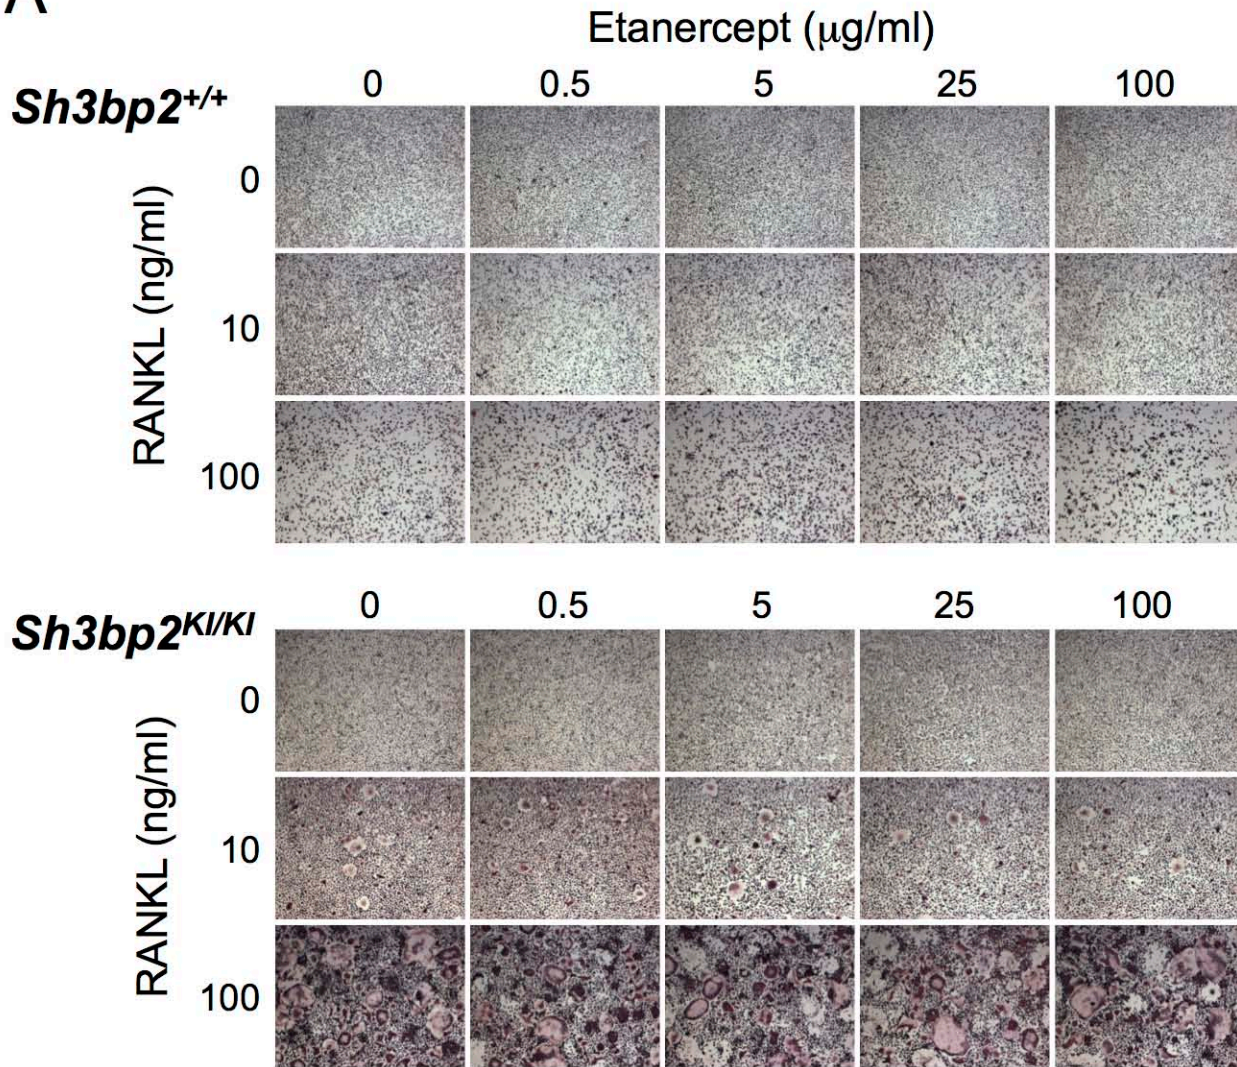

**B**

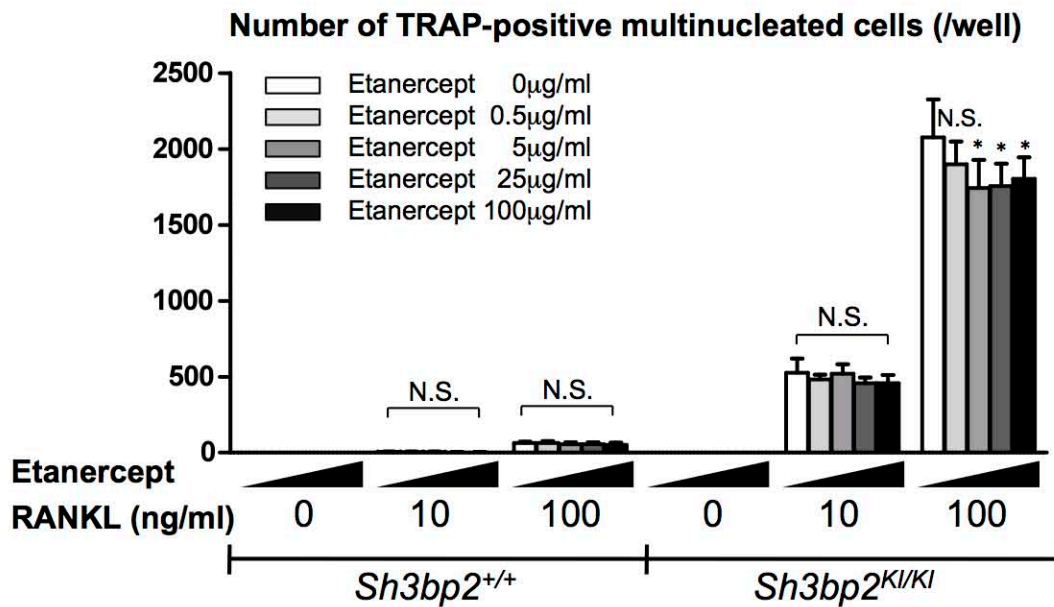

Supplement: NIHMS605990-supplement-Supp_FigureS1-S2.pdf [file NIHMS605990-supplement-Supp_FigureS1-S2.pdf]
